# Supplementary material for: ATR inhibition radiosensitizes cells through augmented DNA damage and G2 cell cycle arrest abrogation
Source: PubMed Central journal article supplement (PMC11466186; doi:10.1172/jci.insight.179599), 2024-10-08
Supplement: jciinsight-9-179599-s098.pdf [file jciinsight-9-179599-s098.pdf]

**Supplementary Material: ATR inhibition radiosensitizes cells through augmented DNA Damage and G2 cell cycle arrest abrogation**

Bright et al.

Supplementary Table 1. Survival curve parameters for in vitro clonogenic assays.

| Cell Line  | Radiation Type          | AZD6738 Concentration ( $\mu\text{M}$ ) | n  | $\alpha$ ( $\text{Gy}^{-1}$ ) | $\sigma_\alpha$ ( $\text{Gy}^{-1}$ ) | $\beta$ ( $\text{Gy}^{-2}$ ) | $\sigma_\beta$ ( $\text{Gy}^{-2}$ ) | Covariance |
|------------|-------------------------|-----------------------------------------|----|-------------------------------|--------------------------------------|------------------------------|-------------------------------------|------------|
| HUVEC      | 6 MV                    | 0                                       | 4  | 0.328                         | 0.034                                | 0.0085                       | 0.0052                              | -0.9671    |
| HUVEC      | 6 MV                    | 0.1                                     | 5  | 0.393                         | 0.034                                | 0.0082                       | 0.0049                              | -0.9648    |
| HUVEC      | 6 MV                    | 2                                       | 7  | 0.611                         | 0.085                                | 0.0538                       | 0.0249                              | -0.9282    |
| HUVEC      | 9.9 keV/ $\mu\text{m}$  | 0                                       | 4  | 0.636                         | 0.085                                | 0.0120                       | 0.0168                              | -0.9563    |
| HUVEC      | 9.9 keV/ $\mu\text{m}$  | 0.1                                     | 4  | 0.656                         | 0.060                                | 0.0171                       | 0.0145                              | -0.9548    |
| HUVEC      | 9.9 keV/ $\mu\text{m}$  | 2                                       | 4  | 1.215                         | 0.133                                | 0.0000                       | 0.0539                              | -0.9531    |
| H460       | 6 MV                    | 0                                       | 11 | 0.227                         | 0.041                                | 0.0612                       | 0.0090                              | -0.9624    |
| H460       | 6 MV                    | 0.1                                     | 6  | 0.269                         | 0.053                                | 0.0963                       | 0.0128                              | -0.9602    |
| H460       | 6 MV                    | 1                                       | 4  | 0.772                         | 0.093                                | 0.0000                       | 0.0237                              | -0.939     |
| H460       | 9.9 keV/ $\mu\text{m}$  | 0                                       | 11 | 0.310                         | 0.117                                | 0.1204                       | 0.0362                              | -0.9644    |
| H460       | 9.9 keV/ $\mu\text{m}$  | 0.1                                     | 7  | 0.526                         | 0.082                                | 0.1498                       | 0.0254                              | -0.9645    |
| H460       | 9.9 keV/ $\mu\text{m}$  | 1                                       | 4  | 1.445                         | 0.207                                | 0.0000                       | 0.0000                              | -0.9494    |
| H1299      | 6 MV                    | 0                                       | 11 | 0.092                         | 0.038                                | 0.0219                       | 0.0050                              | -0.971     |
| H1299      | 6 MV                    | 0.1                                     | 5  | 0.259                         | 0.032                                | 0.0040                       | 0.0051                              | -0.9547    |
| H1299      | 6 MV                    | 1                                       | 4  | 0.595                         | 0.084                                | 0.0081                       | 0.0144                              | -0.9463    |
| H1299      | 9.9 keV/ $\mu\text{m}$  | 0                                       | 9  | 0.226                         | 0.045                                | 0.0205                       | 0.0077                              | -0.9661    |
| H1299      | 9.9 keV/ $\mu\text{m}$  | 0.1                                     | 5  | 0.100                         | 0.028                                | 0.0521                       | 0.0052                              | -0.959     |
| H1299      | 9.9 keV/ $\mu\text{m}$  | 1                                       | 4  | 0.745                         | 0.134                                | 0.0102                       | 0.0311                              | -0.9491    |
| PANC1      | 6 MV                    | 0                                       | 5  | 0.182                         | 0.038                                | 0.0297                       | 0.0058                              | -0.9636    |
| PANC1      | 6 MV                    | 0.1                                     | 4  | 0.143                         | 0.038                                | 0.0362                       | 0.0058                              | -0.9629    |
| PANC1      | 6 MV                    | 2                                       | 4  | 0.263                         | 0.051                                | 0.0354                       | 0.0097                              | -0.9383    |
| PANC1      | 9.9 keV/ $\mu\text{m}$  | 0                                       | 5  | 0.302                         | 0.039                                | 0.0373                       | 0.0084                              | -0.9599    |
| PANC1      | 9.9 keV/ $\mu\text{m}$  | 0.1                                     | 5  | 0.201                         | 0.068                                | 0.0767                       | 0.0153                              | -0.9565    |
| PANC1      | 9.9 keV/ $\mu\text{m}$  | 2                                       | 5  | 0.356                         | 0.065                                | 0.0688                       | 0.0182                              | -0.951     |
| PANC10.05  | 6 MV                    | 0                                       | 4  | 0.214                         | 0.050                                | 0.0129                       | 0.0066                              | -0.9645    |
| PANC10.05  | 6 MV                    | 0.1                                     | 3  | 0.269                         | 0.071                                | 0.0228                       | 0.0095                              | -0.9561    |
| PANC10.05  | 6 MV                    | 2                                       | 4  | 0.468                         | 0.132                                | 0.0518                       | 0.0335                              | -0.9454    |
| PANC10.05  | 9.9 keV/ $\mu\text{m}$  | 0                                       | 5  | 0.274                         | 0.065                                | 0.0319                       | 0.0110                              | -0.9674    |
| PANC10.05  | 9.9 keV/ $\mu\text{m}$  | 0.1                                     | 5  | 0.202                         | 0.052                                | 0.0673                       | 0.0099                              | -0.9522    |
| PANC10.05  | 9.9 keV/ $\mu\text{m}$  | 2                                       | 5  | 0.885                         | 0.124                                | 0.0048                       | 0.0369                              | -0.9633    |
| MDA-MB-231 | 6 MV                    | 0                                       | 8  | 0.307                         | 0.056                                | 0.0271                       | 0.0087                              | -0.9596    |
| MDA-MB-231 | 6 MV                    | 0.1                                     | 6  | 0.363                         | 0.048                                | 0.0248                       | 0.0077                              | -0.9596    |
| MDA-MB-231 | 6 MV                    | 2                                       | 6  | 0.685                         | 0.090                                | 0.0122                       | 0.0154                              | -0.9433    |
| MDA-MB-231 | 9.9 keV/ $\mu\text{m}$  | 0                                       | 5  | 0.614                         | 0.055                                | 0.0373                       | 0.0130                              | -0.9505    |
| MDA-MB-231 | 9.9 keV/ $\mu\text{m}$  | 0.1                                     | 4  | 0.810                         | 0.080                                | 0.0035                       | 0.0171                              | -0.9576    |
| MDA-MB-231 | 9.9 keV/ $\mu\text{m}$  | 2                                       | 4  | 1.087                         | 0.119                                | 0.0000                       |                                     | -0.9425    |
| 4T1        | 6MV                     | 0                                       | 9  | 0.103                         | 0.033                                | 0.0291                       | 0.0047                              | -0.9731    |
| 4T1        | 6MV                     | 0.1                                     | 6  | 0.059                         | 0.023                                | 0.0351                       | 0.0033                              | -0.9726    |
| 4T1        | 6MV                     | 0.5                                     | 7  | 0.315                         | 0.061                                | 0.0173                       | 0.0089                              | -0.9594    |
| 4T1        | 3.85 keV/ $\mu\text{m}$ | 0                                       | 3  | 0.026                         | 0.045                                | 0.0498                       | 0.0071                              | -0.9783    |
| 4T1        | 3.85 keV/ $\mu\text{m}$ | 0.5                                     | 3  | 0.000                         | 0.301                                | 0.1750                       | 0.0587                              | -0.9433    |
| 4T1        | 9.9 keV/ $\mu\text{m}$  | 0                                       | 4  | 0.158                         | 0.115                                | 0.0707                       | 0.0238                              | -0.9583    |
| 4T1        | 9.9 keV/ $\mu\text{m}$  | 0.1                                     | 4  | 0.108                         | 0.074                                | 0.0732                       | 0.0150                              | -0.9608    |
| 4T1        | 9.9 keV/ $\mu\text{m}$  | 0.5                                     | 4  | 0.275                         | 0.123                                | 0.0832                       | 0.0267                              | -0.9565    |

Supplementary Table 2. Survival metrics calculated from the linear quadratic model.

| Cell Line  | Radiation Type          | AZD6738 Concentration ( $\mu\text{M}$ ) | SF2Gy  | $\sigma_{\text{SF2Gy}}$ | D <sub>50%</sub> (Gy) | $\sigma_{\text{D50%}}$ (Gy) | D <sub>10%</sub> (Gy) | $\sigma_{\text{D10%}}$ (Gy) |
|------------|-------------------------|-----------------------------------------|--------|-------------------------|-----------------------|-----------------------------|-----------------------|-----------------------------|
| HUVEC      | 6 MV                    | 0                                       | 0.5013 | 0.0244                  | 2.0073                | 0.1349                      | 6.0643                | 0.1250                      |
| HUVEC      | 6 MV                    | 0.1                                     | 0.4412 | 0.0215                  | 1.7041                | 0.1042                      | 5.2805                | 0.1210                      |
| HUVEC      | 6 MV                    | 2                                       | 0.2374 | 0.0206                  | 1.0387                | 0.0893                      | 2.9827                | 0.1030                      |
| HUVEC      | 9.9 keV/ $\mu\text{m}$  | 0                                       | 0.2674 | 0.0287                  | 1.0692                | 0.1100                      | 3.4049                | 0.1641                      |
| HUVEC      | 9.9 keV/ $\mu\text{m}$  | 0.1                                     | 0.2513 | 0.0170                  | 1.0285                | 0.0689                      | 3.2356                | 0.0880                      |
| HUVEC      | 9.9 keV/ $\mu\text{m}$  | 2                                       | 0.0880 | 0.0078                  | 0.5705                | 0.0624                      | 1.8951                | 0.2071                      |
| H460       | 6 MV                    | 0                                       | 0.4971 | 0.0242                  | 1.9877                | 0.1035                      | 4.5527                | 0.0656                      |
| H460       | 6 MV                    | 0.1                                     | 0.3970 | 0.0234                  | 1.6269                | 0.0940                      | 3.6875                | 0.0577                      |
| H460       | 6 MV                    | 1                                       | 0.2137 | 0.0218                  | 0.8984                | 0.1080                      | 2.9846                | 0.3586                      |
| H460       | 9.9 keV/ $\mu\text{m}$  | 0                                       | 0.3321 | 0.0337                  | 1.4349                | 0.1490                      | 3.2704                | 0.0936                      |
| H460       | 9.9 keV/ $\mu\text{m}$  | 0.1                                     | 0.1917 | 0.0136                  | 1.0207                | 0.0702                      | 2.5397                | 0.0512                      |
| H460       | 9.9 keV/ $\mu\text{m}$  | 1                                       | 0.0556 | 0.0230                  | 0.4729                | 0.0674                      | 1.5764                | 0.2255                      |
| H1299      | 6 MV                    | 0                                       | 0.7623 | 0.0437                  | 3.9054                | 0.2942                      | 8.3654                | 0.1903                      |
| H1299      | 6 MV                    | 0.1                                     | 0.5861 | 0.0268                  | 2.5724                | 0.1864                      | 7.9137                | 0.3252                      |
| H1299      | 6 MV                    | 1                                       | 0.2947 | 0.0339                  | 1.1475                | 0.1283                      | 3.6869                | 0.2137                      |
| H1299      | 9.9 keV/ $\mu\text{m}$  | 0                                       | 0.5867 | 0.0358                  | 2.5031                | 0.2061                      | 6.4411                | 0.1724                      |
| H1299      | 9.9 keV/ $\mu\text{m}$  | 0.1                                     | 0.6646 | 0.0238                  | 2.8114                | 0.1017                      | 5.7568                | 0.0702                      |
| H1299      | 9.9 keV/ $\mu\text{m}$  | 1                                       | 0.2165 | 0.0335                  | 0.9192                | 0.1290                      | 2.9706                | 0.2014                      |
| PANC1      | 6 MV                    | 0                                       | 0.6169 | 0.0334                  | 2.6558                | 0.1846                      | 6.2588                | 0.1151                      |
| PANC1      | 6 MV                    | 0.1                                     | 0.6502 | 0.0357                  | 2.8270                | 0.1876                      | 6.2420                | 0.1092                      |
| PANC1      | 6 MV                    | 2                                       | 0.5131 | 0.0347                  | 2.0637                | 0.1680                      | 5.1659                | 0.1464                      |
| PANC1      | 9.9 keV/ $\mu\text{m}$  | 0                                       | 0.4713 | 0.0224                  | 1.8676                | 0.1050                      | 4.7943                | 0.0822                      |
| PANC1      | 9.9 keV/ $\mu\text{m}$  | 0.1                                     | 0.4922 | 0.0395                  | 1.9687                | 0.1587                      | 4.3224                | 0.0997                      |
| PANC1      | 9.9 keV/ $\mu\text{m}$  | 2                                       | 0.3724 | 0.0244                  | 1.5069                | 0.1075                      | 3.7486                | 0.0908                      |
| PANC10.05  | 6 MV                    | 0                                       | 0.6185 | 0.0458                  | 2.7710                | 0.3127                      | 7.4237                | 0.2410                      |
| PANC10.05  | 6 MV                    | 0.1                                     | 0.5330 | 0.0566                  | 2.1752                | 0.3047                      | 5.7539                | 0.2668                      |
| PANC10.05  | 6 MV                    | 2                                       | 0.3188 | 0.0460                  | 1.2953                | 0.1984                      | 3.5364                | 0.1847                      |
| PANC10.05  | 9.9 keV/ $\mu\text{m}$  | 0                                       | 0.5085 | 0.0445                  | 2.0416                | 0.2185                      | 5.2221                | 0.1476                      |
| PANC10.05  | 9.9 keV/ $\mu\text{m}$  | 0.1                                     | 0.5104 | 0.0345                  | 2.0434                | 0.1432                      | 4.5396                | 0.0926                      |
| PANC10.05  | 9.9 keV/ $\mu\text{m}$  | 2                                       | 0.1670 | 0.0188                  | 0.7797                | 0.0841                      | 2.5655                | 0.1166                      |
| MDA-MB-231 | 6 MV                    | 0                                       | 0.4854 | 0.0382                  | 1.9282                | 0.1870                      | 5.1539                | 0.1573                      |
| MDA-MB-231 | 6 MV                    | 0.1                                     | 0.4382 | 0.0297                  | 1.7101                | 0.1372                      | 4.7832                | 0.1333                      |
| MDA-MB-231 | 6 MV                    | 2                                       | 0.2419 | 0.0300                  | 0.9941                | 0.1065                      | 3.1809                | 0.1958                      |
| MDA-MB-231 | 9.9 keV/ $\mu\text{m}$  | 0                                       | 0.2522 | 0.0159                  | 1.0603                | 0.0646                      | 3.1475                | 0.0765                      |
| MDA-MB-231 | 9.9 keV/ $\mu\text{m}$  | 0.1                                     | 0.1951 | 0.0188                  | 0.8524                | 0.0692                      | 2.8078                | 0.1243                      |
| MDA-MB-231 | 9.9 keV/ $\mu\text{m}$  | 2                                       | 0.1137 | 0.0271                  | 0.6306                | 0.0698                      | 2.1169                | 0.2322                      |
| 4T1        | 6 MV                    | 0                                       | 0.7242 | 0.0340                  | 3.4202                | 0.1959                      | 7.2992                | 0.1100                      |
| 4T1        | 6 MV                    | 0.1                                     | 0.7725 | 0.0254                  | 3.6840                | 0.1306                      | 7.3049                | 0.0732                      |
| 4T1        | 6 MV                    | 0.5                                     | 0.4967 | 0.0435                  | 1.9828                | 0.2267                      | 5.5876                | 0.2088                      |
| 4T1        | 3.85 keV/ $\mu\text{m}$ | 0                                       | 0.7786 | 0.0483                  | 3.4841                | 0.1978                      | 6.5503                | 0.0940                      |
| 4T1        | 3.85 keV/ $\mu\text{m}$ | 0.5                                     | 0.4966 | 0.1927                  | 1.9902                | 0.5557                      | 3.6273                | 0.3497                      |
| 4T1        | 9.9 keV/ $\mu\text{m}$  | 0                                       | 0.5492 | 0.0778                  | 2.2059                | 0.3121                      | 4.6959                | 0.1882                      |
| 4T1        | 9.9 keV/ $\mu\text{m}$  | 0.1                                     | 0.6017 | 0.0557                  | 2.4289                | 0.2129                      | 4.9218                | 0.1232                      |
| 4T1        | 9.9 keV/ $\mu\text{m}$  | 0.5                                     | 0.4139 | 0.0609                  | 1.6745                | 0.2459                      | 3.8631                | 0.1628                      |

Supplementary Table 3. Proton relative biological effectiveness in the indicated cell lines.

| Cell Line  | Radiation Type          | AZD6738 Concentration ( $\mu\text{M}$ ) | RBE <sub>D10%</sub> | $\sigma_{\text{RBED10\%}}$ | RBE <sub>D50%</sub> | $\sigma_{\text{RBED50\%}}$ |
|------------|-------------------------|-----------------------------------------|---------------------|----------------------------|---------------------|----------------------------|
| HUVEC      | 9.9 keV/ $\mu\text{m}$  | 0                                       | 1.78                | 0.09                       | 1.88                | 0.40                       |
| HUVEC      | 9.9 keV/ $\mu\text{m}$  | 0.1                                     | 1.63                | 0.06                       | 1.66                | 0.15                       |
| HUVEC      | 9.9 keV/ $\mu\text{m}$  | 2                                       | 1.57                | 0.18                       | 1.82                | 0.25                       |
| H460       | 9.9 keV/ $\mu\text{m}$  | 0                                       | 1.39                | 0.04                       | 1.39                | 0.30                       |
| H460       | 9.9 keV/ $\mu\text{m}$  | 0.1                                     | 1.45                | 0.04                       | 1.59                | 0.14                       |
| H460       | 9.9 keV/ $\mu\text{m}$  | 1                                       | 1.89                | 0.35                       | 1.90                | 0.35                       |
| H1299      | 9.9 keV/ $\mu\text{m}$  | 0                                       | 1.30                | 0.05                       | 1.56                | 0.37                       |
| H1299      | 9.9 keV/ $\mu\text{m}$  | 0.1                                     | 1.37                | 0.06                       | 0.91                | 0.07                       |
| H1299      | 9.9 keV/ $\mu\text{m}$  | 1                                       | 1.24                | 0.11                       | 1.25                | 0.22                       |
| PANC1      | 9.9 keV/ $\mu\text{m}$  | 0                                       | 1.31                | 0.03                       | 1.42                | 0.32                       |
| PANC1      | 9.9 keV/ $\mu\text{m}$  | 0.1                                     | 1.44                | 0.04                       | 1.44                | 0.15                       |
| PANC1      | 9.9 keV/ $\mu\text{m}$  | 2                                       | 1.38                | 0.05                       | 1.37                | 0.15                       |
| PANC10.05  | 9.9 keV/ $\mu\text{m}$  | 0                                       | 1.42                | 0.06                       | 1.36                | 0.42                       |
| PANC10.05  | 9.9 keV/ $\mu\text{m}$  | 0.1                                     | 1.27                | 0.06                       | 1.06                | 0.17                       |
| PANC10.05  | 9.9 keV/ $\mu\text{m}$  | 2                                       | 1.38                | 0.10                       | 1.66                | 0.31                       |
| MDA-MB-231 | 9.9 keV/ $\mu\text{m}$  | 0                                       | 1.64                | 0.06                       | 1.82                | 0.43                       |
| MDA-MB-231 | 9.9 keV/ $\mu\text{m}$  | 0.1                                     | 1.70                | 0.09                       | 2.01                | 0.23                       |
| MDA-MB-231 | 9.9 keV/ $\mu\text{m}$  | 2                                       | 1.50                | 0.19                       | 1.58                | 0.24                       |
| 4T1        | 3.85 keV/ $\mu\text{m}$ | 0                                       | 1.11                | 0.02                       | 0.98                | 0.08                       |
| 4T1        | 3.85 keV/ $\mu\text{m}$ | 0.5                                     | 1.54                | 0.16                       | 1.00                | 0.30                       |
| 4T1        | 9.9 keV/ $\mu\text{m}$  | 0                                       | 1.55                | 0.07                       | 1.55                | 0.37                       |
| 4T1        | 9.9 keV/ $\mu\text{m}$  | 0.1                                     | 0.81                | 0.03                       | 1.52                | 0.14                       |
| 4T1        | 9.9 keV/ $\mu\text{m}$  | 0.5                                     | 1.45                | 0.08                       | 1.18                | 0.22                       |

Supplementary Table 4. Summary of key resources.

| Resource                                                                      | Vendor                       | Catalogue Number |
|-------------------------------------------------------------------------------|------------------------------|------------------|
| 16% Paraformaldehyde Aqueous Solution                                         | Electron Microscopy Sciences | 15710            |
| Goat serum                                                                    | Abcam                        | ab7481           |
| Tween-20                                                                      | ThermoFisher                 | 85113            |
| Fish gelatin                                                                  | MilliporeSigma               | G7041            |
| Fluoromount-G                                                                 | ThermoFisher                 | 00-4958-02       |
| Triton-X                                                                      | ThermoFisher                 | 85111            |
| 53BP1 Antibody (polyclonal)                                                   | NOVUS biologicals            | NB100-304        |
| Anti-phospho-Histone H2A.X (Ser139) Antibody, clone JBW301                    | Millipore Sigma              | JBW301           |
| AZD6738                                                                       | Selleckchem                  | S7693            |
| BD Cytofix Fixation Buffer                                                    | BD Biosciences               | 554655           |
| CD11b – Alexa Fluor 700                                                       | BioLegend                    | 101222           |
| CD11c – Brilliant Violet 510                                                  | BioLegend                    | 117337           |
| CD163 – PE                                                                    | BioLegend                    | 155308           |
| CD4 – Brilliant Violet 510                                                    | BioLegend                    | 100449           |
| CD45 – APC/Fire750                                                            | BioLegend                    | 103154           |
| CD45 – Pacific Blue                                                           | BioLegend                    | 103126           |
| CD8a – PE/Cy7                                                                 | BioLegend                    | 100722           |
| Cell strainer (70 µm)                                                         | Falcon                       | 352350           |
| DMEM                                                                          | cytiva                       | SH30243          |
| DMSO                                                                          | EMD Millipore                | 317275           |
| DNase                                                                         | Sigma                        | D5025            |
| Endothelial Cell Media                                                        | ScienCell                    | 1001             |
| F4/80 - PE/Dazzle 594                                                         | BioLegend                    | 123146           |
| FBS                                                                           | Sigma                        | F0926            |
| FxCycle™ PI/RNase Staining Solution                                           | Invitrogen                   | F10797           |
| HI-FBS                                                                        | HyClone                      | SH30910          |
| IFN $\gamma$ – APC                                                            | BioLegend                    | 505810           |
| Ionomycin                                                                     | Sigma                        | I9657            |
| Liberase                                                                      | Roche                        | 05401127001      |
| Lymphocyte Separation Medium                                                  | Corning                      | 25-072-CV        |
| PD1 – PE/Dazzle 594                                                           | BioLegend                    | 135228           |
| Perm buffer                                                                   | Invitrogen                   | 00-8333-56       |
| Phorbol 12-myristate 13-acetate (PMA)                                         | Sigma                        | P1585            |
| Phospho-Histone H3 (Ser10) (D2C8) XP® Rabbit mAb (Alexa Fluor® 488 Conjugate) | Cell Signaling Technology    | 3465             |
| Polyethylene-Glycol-300                                                       | Spectrum Chemical            | P0108            |
| Protein Transport Inhibitor (GolgiStop)                                       | BD Biosciences               | 51-2092KZ        |
| Rad51 antibody [14B4]                                                         | Gentex                       | GTX70230         |
| RPMI-1640                                                                     | Corning                      | 10-040-CV        |
| TruStain FcX™ PLUS (anti-mouse CD16/32)                                       | Biolegend                    | 156604           |

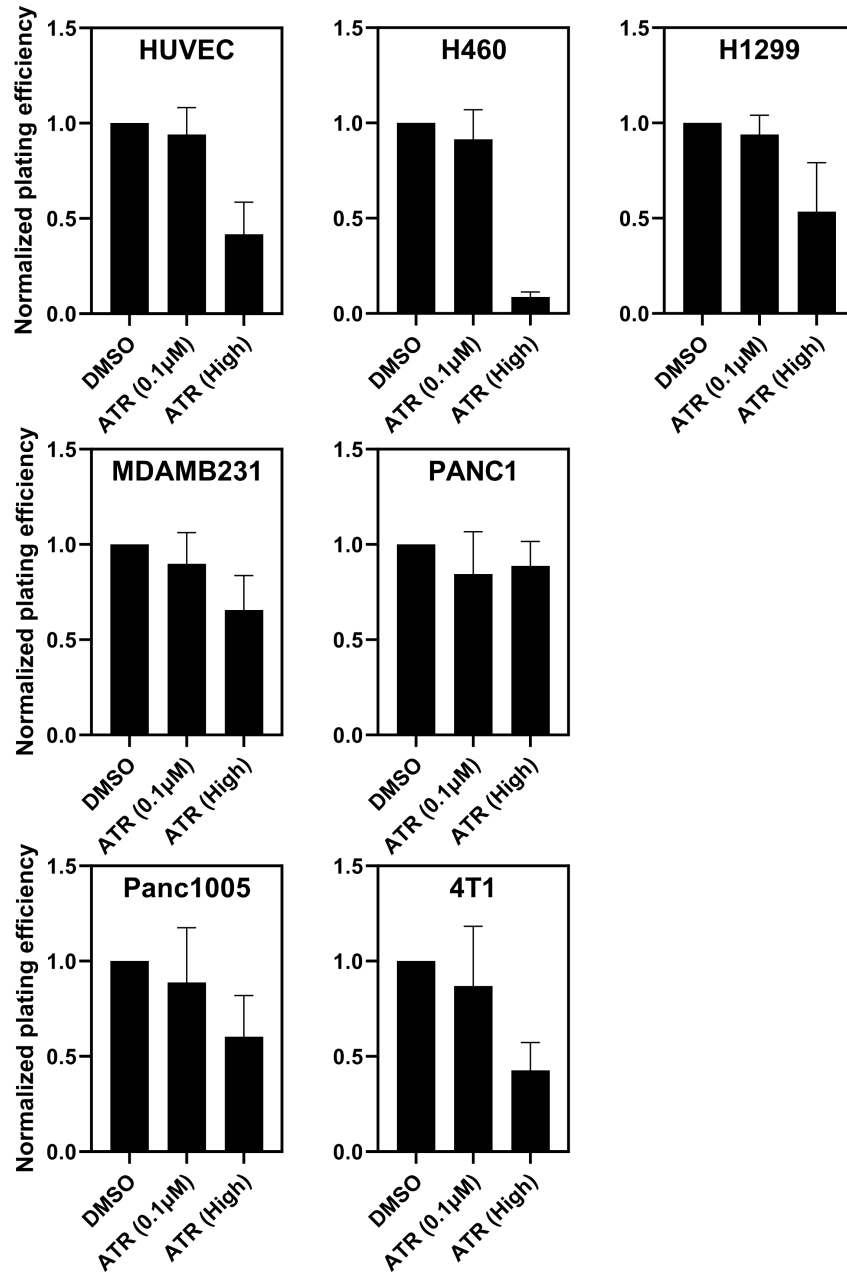

Supplementary Figure 1: Plating efficiency for each drug condition normalized to its respective DMSO condition.

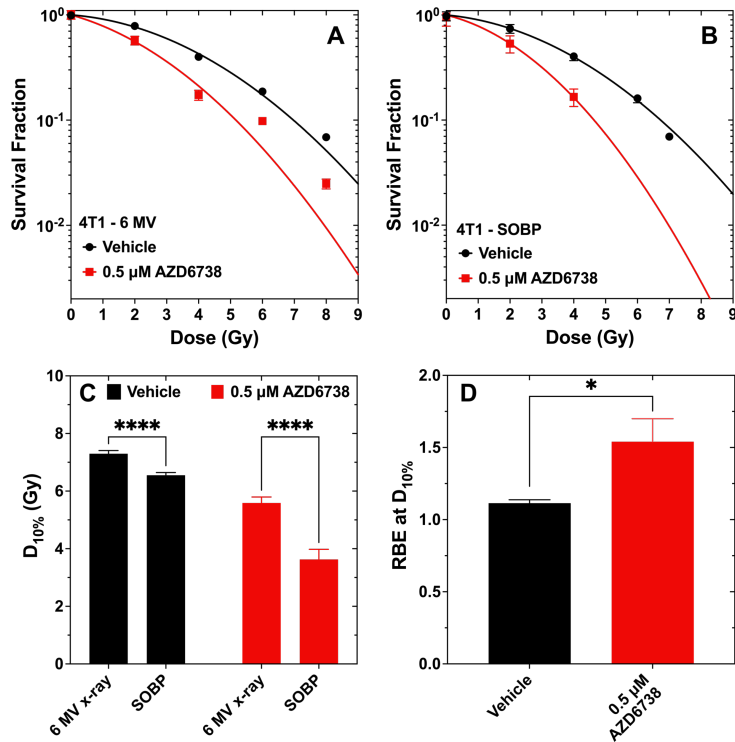

Supplementary Figure 2. Surviving fraction,  $D_{10\%}$ , and RBE. (A-B) 4T1 cell survival after exposure to photons or spread-out Bragg peak (SOBP) protons (3.85 keV/ $\mu$ m) (Supplementary Figure 6) with vehicle or 0.5  $\mu$ M AZD6738. (C)  $D_{10\%}$  for 4T1 cells exposed to photons or protons with or without AZD6738. (D) Relative biological effectiveness (RBE) at  $D_{10\%}$  of vehicle and AZD6738 for SOBP protons. Error bars represent the SD. Statistical significance was assessed with two-way ANOVA with Tukey's multiple comparisons test (C) or unpaired t-test (D). ns: non-significant, \*:  $P < 0.05$ , \*\*:  $P < 0.01$ , \*\*\*:  $P < 0.001$ , \*\*\*\*:  $P < 0.0001$ .

### NCI-H460

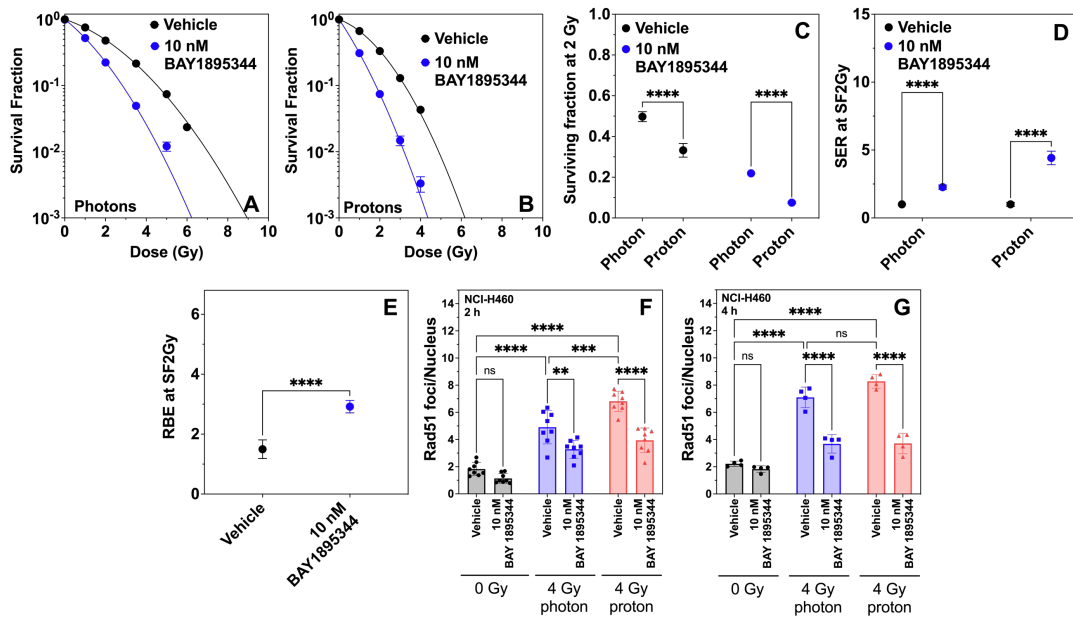

### NCI-H1299

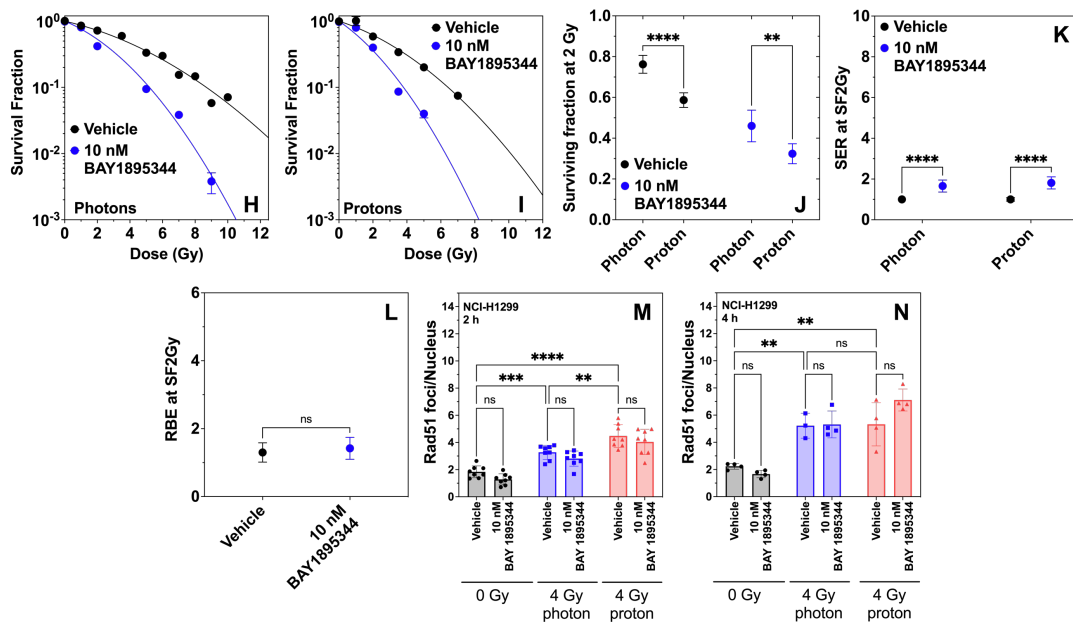

Supplementary Figure 3: Clonogenic survival curves of NCI-H460 and NCI-H1299 treated with photons and protons (A-D) combined with the ATR inhibitor BAY1895344. Surviving fraction was significantly reduced with BAY1895344 in both cell lines (E-F). Sensitization was significantly increased with BAY1895344. RBE was significantly increased for NCI-H460 (I) but not NCI-H1299 (J). RAD51 foci were significantly reduced with BAY1895344 in NCI-H460 (K-L) but not in NCI-H1299 (M-N). Error bars represent the SD. Statistical significance was assessed with two-way ANOVA with Tukey's multiple comparisons test (C) or unpaired t-test (D). ns: non-significant, \*:  $P < 0.05$ , \*\*:  $P < 0.01$ , \*\*\*:  $P < 0.001$ , \*\*\*\*:  $P < 0.0001$ .

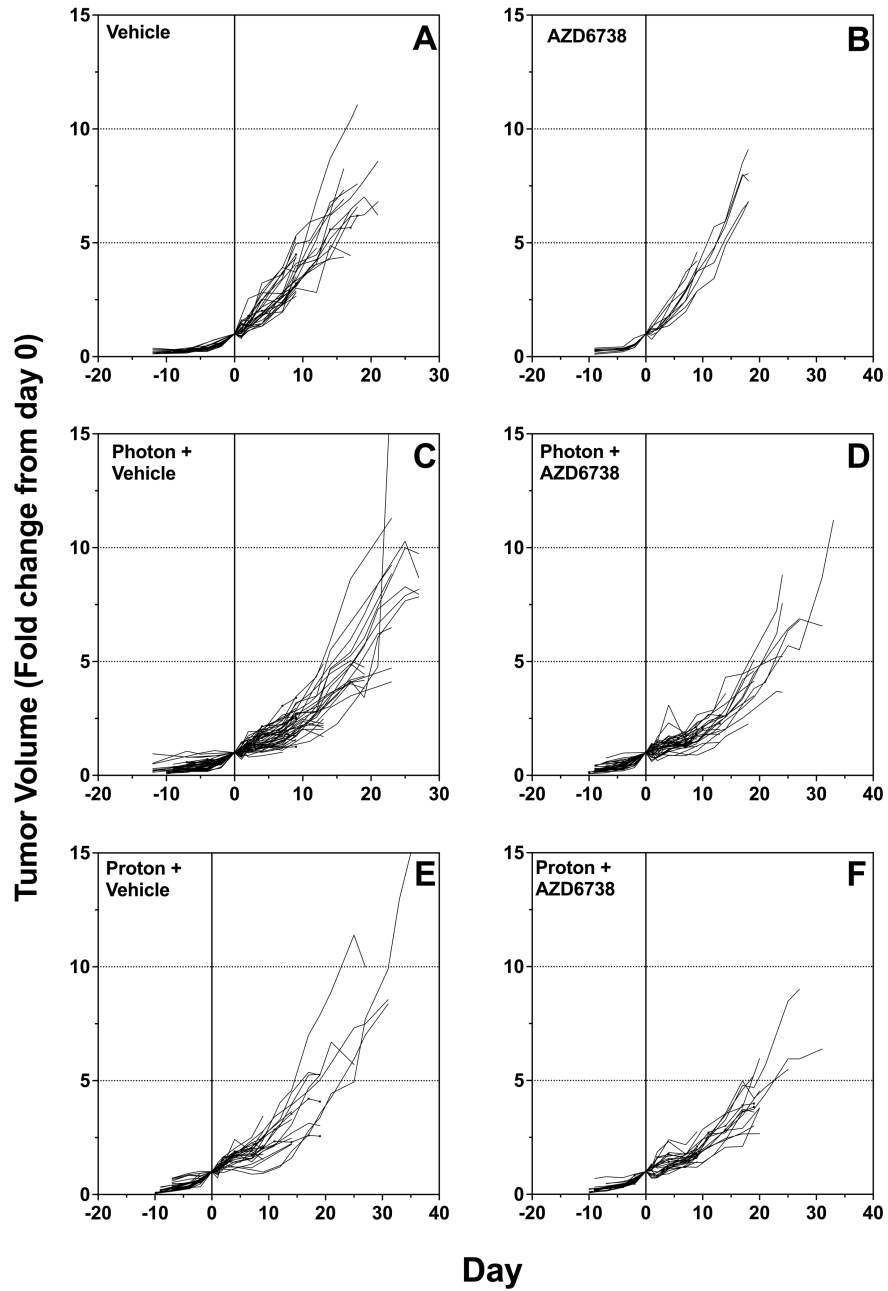

Supplementary Figure 4. Tumor growth delay in individual mice.



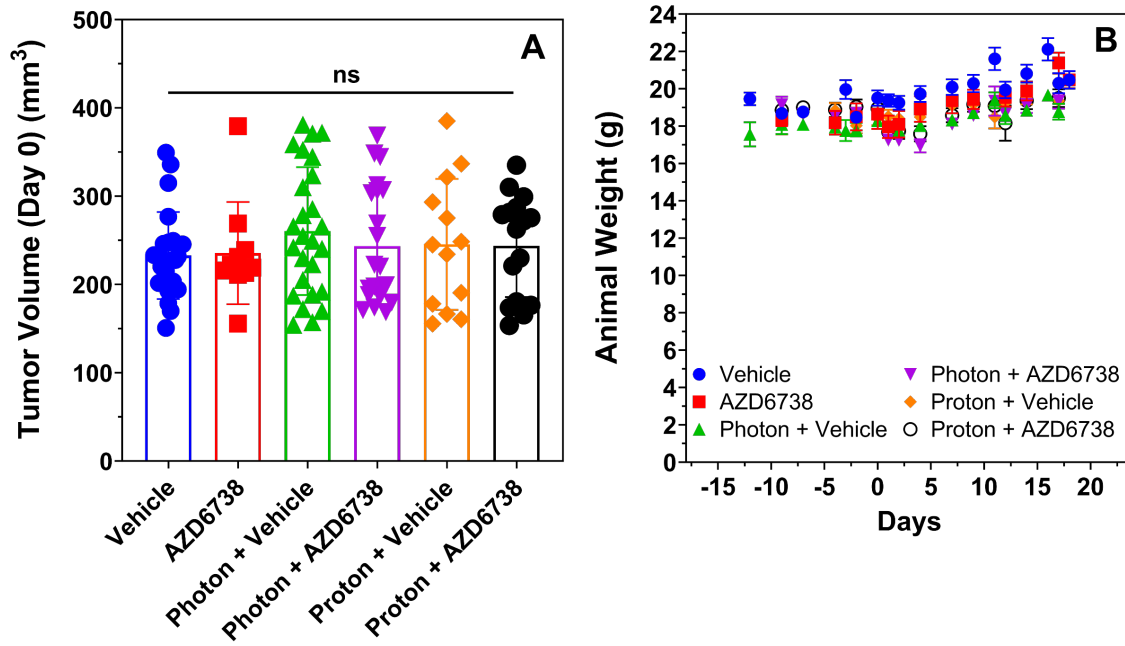

Supplementary Figure 5. Starting tumor volumes at day 0 and mean mouse body weights over time. Error bars represent the SD (A) or SEM (B). Statistical significance was assessed with two-way ANOVA with Tukey's multiple comparisons test. ns: non-significant, \*: P<0.05, \*\*: P<0.01, \*\*\*: P<0.001, \*\*\*\*: P<0.0001.

## Supplementary Method 1. Irradiation conditions

Photon irradiations were done at the Proton Therapy Center in parallel with the proton irradiations so that cells were subjected to the same conditions except for radiation type. Photon irradiations were done with 6-MV x-rays (Truebeam, Varian Medical System), with a field size of 30 cm × 30 cm and gantry at 180° (beam from bottom to top). The beam crossed the couch, water equivalent blocks, and bottom of plates to a total water-equivalent thickness of 10 cm. Plastic blocks (>10 cm) were stacked upstream the plates to provide backscatter.

Proton irradiations were done with a double scattering nozzle with field size 18 cm × 18 cm (medium snout fully retracted), range ( $r_{90}$ ) = 4.3 cm,  $E$  = 100 MeV (nominal energy), and gantry at 180° (beam from bottom to top). The beam crossed the couch, water equivalent blocks, and bottom of plates to a total WET of 4.42 cm. For spread-out Bragg peak irradiations, range ( $r_{90}$ ) = 16.5 cm (with the use of range shifters),  $E$  = 200 MeV (nominal energy), SOBP = 4 cm, the beam crossed the couch, water equivalent blocks, and bottom of plates to a total WET of 15.6 cm.

For animal irradiations, mice were immobilized with custom-built restrainers that isolate the tumor-bearing hind leg. The restrainers are then placed in a jig that allows positioning of tumors of up to six mice in a water tank (31.2 cm length with 0.6-cm Lucite walls) so that clinical radiation beams could be delivered at a fixed depth with high precision and throughput.

Photon irradiations were done at the Proton Therapy Center in parallel with the proton irradiations so that animals were subjected to same conditions except for radiation type. Photon irradiations were done with 6-MV x-rays (Truebeam), field size 30 cm × 30 cm, and gantry at 0° and 270°. Parallel opposed beams were used to create a homogenous dose distribution. Tumors were positioned at a depth of 15.6 cm.

Proton irradiations were done with a double scattering nozzle with a field size of 25 × 25 cm<sup>2</sup> (large snout fully retracted), range ( $r_{90}$ ) = 16.5 cm,  $E$  = 200 MeV (nominal energy), SOBP = 4 cm, gantry at 0° and 270°. Parallel opposed beams were used to create homogenous dose and LET distributions. The water tank and setup were the same as those used for photon irradiations.

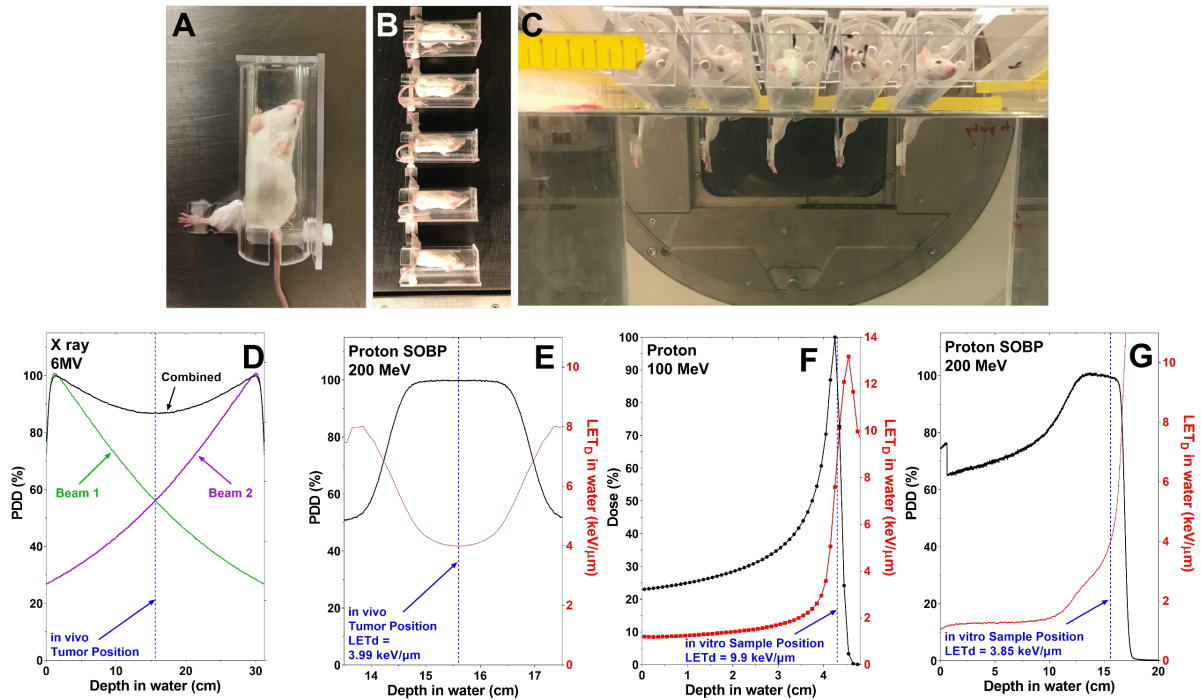

Supplementary Figure 6. (A) Restrainer that allows immobilization of the left leg of a mouse. (B-C) Jig that allows simultaneous irradiation of up to six mice with their tumors placed inside a water tank. A half-beam block is used to spare most of the mouse's body and internal organs from radiation. This setup allows each individual tumor to be precisely aligned to the radiation field. (D-E) We used this setup for 6-MV X-ray and proton irradiations with opposite lateral beams. The percentage depth dose and LET depth distributions in D-E are measured beam data for 6-MV photons and Monte Carlo simulated for protons. (F) In vitro proton irradiations were done with a 100-MeV (nominal energy) pristine beam with LET<sub>D</sub> in water of 9.9 keV/μm. (G) We irradiated 4T1 cells in vitro and treated them with vehicle or AZD6738 to confirm radiosensitization in the LET range observed for our in vivo experiments; data are from Monte Carlo simulations. Samples were placed at the same depth as the tumors in our in vitro experiments.

## Supplementary Method 2: Tumor-infiltrating lymphocyte extraction and analysis

Mice were euthanized in accordance with IACUC protocols at predefined times. The tumors were excised and kept in RPMI-1640 base medium until all samples were ready for processing. The base medium was removed, and the bulk tumor samples were manually separated into fine pieces in digestion buffer (RPMI-1640, 250 µg/ml Liberase, 20 µg/ml DNase I), and then kept at 37°C with agitation for 30 minutes. The reaction was stopped with 1 mL of heat-inactivated fetal bovine serum before the samples were run through a 70 µm cell strainer. The filtered cell solution was centrifuged at 400 × *g* for 5 minutes. The cell pellet was collected and spun and washed with FACS buffer (PBS + 2% HI-FBS) by centrifugation at 400 × *g* for 5 minutes. The cell pellet was collected in PBS and immune cells were enriched by centrifugation with lymphocyte separation media for 30 minutes at room temperature at a speed of 400 × *g* (minimum acceleration and deceleration). The immune cells were collected and were incubated in RPMI-1640 (10% HI-FBS) with 0.5 µg/mL ionomycin, 50 ng/mL phorbol 12-myristate 13-acetate and protein transport inhibitor (GolgiStop) for 4 hours at 37°C. Cells were then washed and blocked with 0.5 µg TruStain FcX Plus for 20 minutes on ice. Antibodies were combined into a cocktail and added directly to the samples, which were then incubated for 20 minutes on ice in the dark. The cells were then washed twice with FACS buffer and centrifuged at 400 × *g* for 5 minutes. The cells were then fixed with BD Cytfix for 12 minutes on ice in the dark and stored overnight at 4°C. The following day, cells were incubated with permeabilization buffer for 45 minutes at room temperature in the dark and then stained with antibodies for intracellular markers for 45 minutes in the dark at room temperature. Cells were washed twice in FACS buffer by centrifugation at 400 × *g* at room temperature and analyzed by flow cytometry at the MD Anderson Flow Cytometry and Cellular Imaging Core facility.

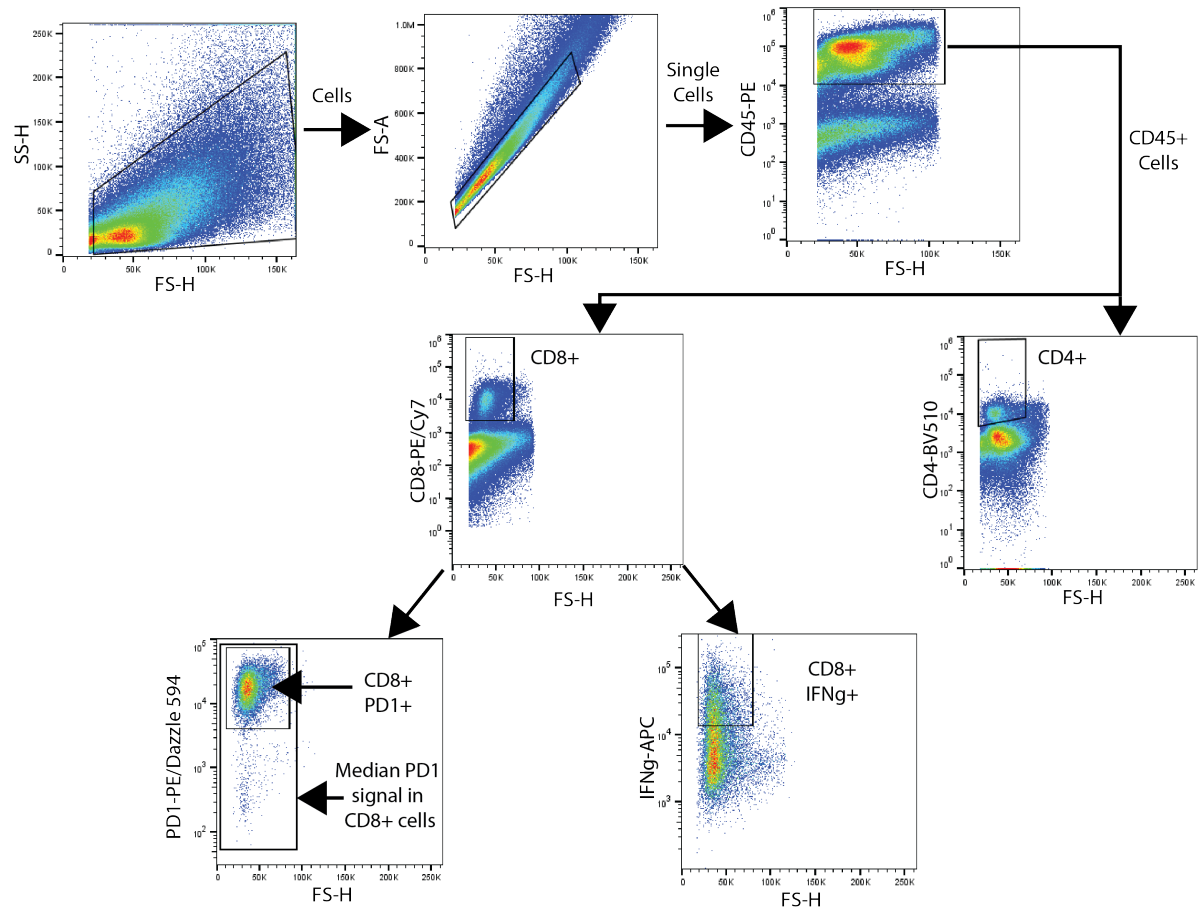

Supplementary Figure 7. Tumor-infiltrating lymphocyte gating strategy. Cells were initially gated for single cells and CD45<sup>+</sup> immune cells before being gated for individual markers.

### Supplementary Method 3: Method to calculate mean values of parameters of the clonogenic cell survival curves

For an individual clonogenic assay (replicates performed on the same day) we determined the plating efficiency first by computing the survival quotient for each dose,  $SQ_D = N_{colonies,D} / N_{seeded,D}$ . Then the  $SQ_D$  values were plotted versus dose and fit via variance weighted non-linear least squares minimization to an unnormalized version of the linear quadratic model:  $SQ = PE \exp(-\alpha D - \beta D^2)$ , where PE is the plating efficiency and  $\alpha$  and  $\beta$  are free parameters. The plating efficiency determined from each experiment's fit was then used to calculate the survival fraction for each dose,  $SF_D = SQ_D / PE$ .

To combine data from multiple, biologically independent experiments, performed across time, we took the collection of all  $SF_{D,combined}$  values measured across independent experiments,  $j$  and fit them simultaneously to the linear quadratic model:

$$SF_{combined,j}(D) = e^{-\alpha D - \beta D^2}$$

This ensures that the uncertainties reported from the final fit parameters incorporate both the inter- and intra-experimental variability present in the data while also properly accounting for the statistical power of the data set as a whole. In this work, to obtain the survival parameters for a given cell line's response to a particular condition, we fit the collection of all  $SF_{D,combined,j}$  measured to the linear quadratic model via variance-weighted least squares minimization in Graph Pad Prism 10 (Graph Pad, San Diego, CA). This weighting ensures that the different confidences we have in the measured responses from different experiments are accounted for in the fit, while also ensuring, that our final fits are not insensitive to the data at lower survival levels. The uncertainties in the fit parameters provided, as well as their covariance, were obtained using Graph Pad Prism 10, and correspond to the elements of the covariance matrix associated with the fit. Survival metrics were calculated using the linear quadratic model for surviving fraction at 2 Gy or by rearranging the linear quadratic expression to:

$$D_{endpoint} = \frac{-\alpha \pm \sqrt{\alpha^2 - 4\beta \cdot \ln(SF_{endpoint})}}{2\beta}$$

for  $D_{50\%}$  and  $D_{10\%}$ . This approach generates a single value for each survival curve metric, as opposed to taking the average of multiple values calculated from individual curves. Uncertainty for a given endpoint was calculated by using error propagation formula.

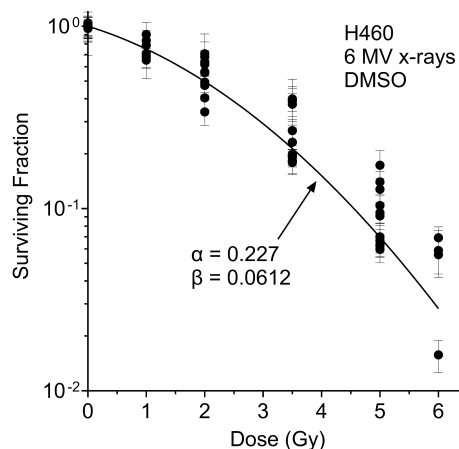

Supplementary Figure 8: To determine survival metrics including SF2Gy,  $D_{10\%}$  and  $D_{50\%}$ , all replicates were fit to the linear quadratic model. Alpha and beta were determined from this global fit and used to generate the representative metric for a given condition.
